# Supplementary material for: p53 activation contributes to patulin-induced nephrotoxicity via modulation of reactive oxygen species generation
Source: PubMed Central journal article supplement (PMC4829895; doi:10.1038/srep24455), 2016-04-13
Supplement: srep24455-s1.pdf [file srep24455-s1.pdf]

## Supplementary information:

### p53 activation contributes to patulin-induced nephrotoxicity via modulation of reactive oxygen species generation

Huan Jin, Shutao Yin, Xinhua Song, Enxiang Zhang, Lihong Fan and Hongbo Hu

FigS1

A.

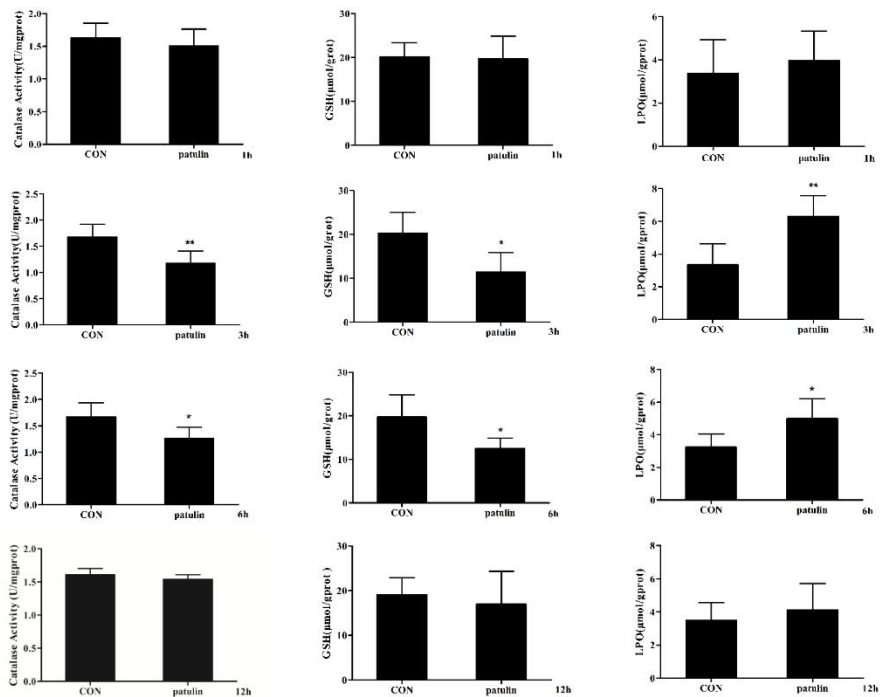

A.

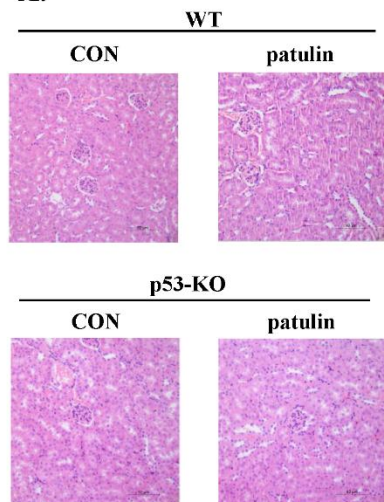

C.

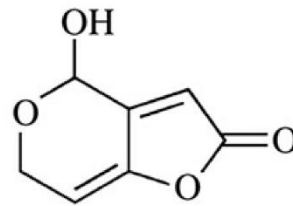

**Figure S1** A. The kinetic process of patulin-induced oxidative stress in vivo. Patulin (2.5mg/kg, dissolved in saline) was given by i.p injection for 1, 3, 6 or 12 h and then the samples were collected for analysis of the oxidative stress biomarkers. B. Histopathological changes of kidney tissues by patulin in p53wide type/knockout mice measured by H&E staining. C. The chemical structure of patulin.
